# Supplementary material for: Glypican-3 (GPC3) is associated with MCPyV-negative status and impaired outcome in Merkel cell carcinoma
Source: PubMed Central journal article supplement (PMC9348696; doi:10.18632/oncotarget.28260), 2022-08-03
Supplement: oncotarget-13-28260-s001.pdf [file oncotarget-13-28260-s001.pdf]

# Glypican-3 (GPC3) is associated with MCPyV-negative status and impaired outcome in merkel cell carcinoma

## SUPPLEMENTARY MATERIALS

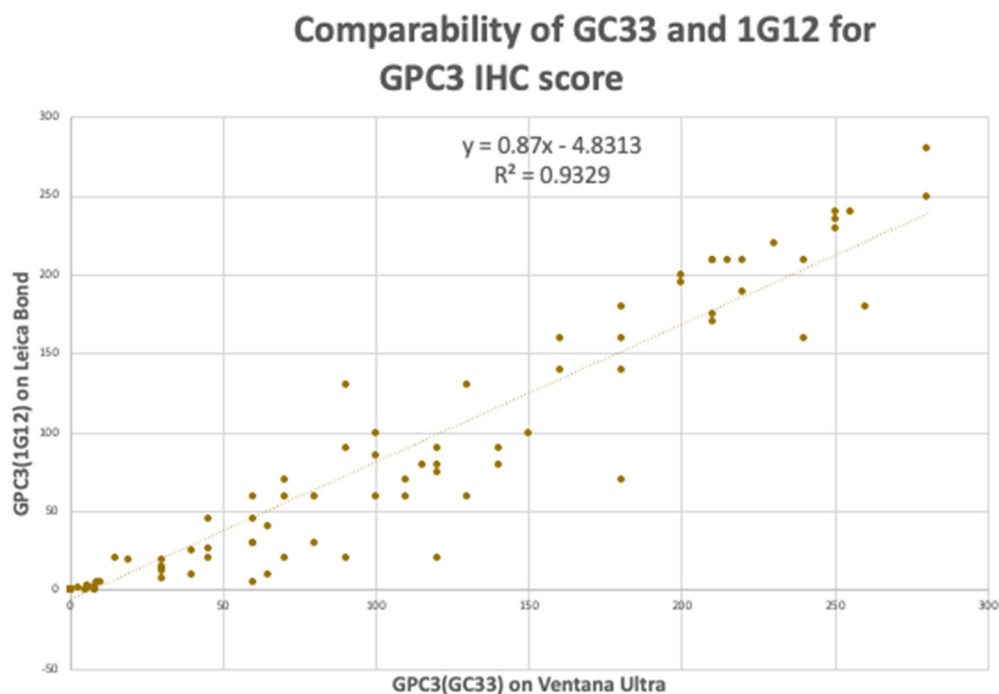

**Supplementary Figure 1: Comparisons between the 2 IHC assays.** Legend: x-axis is GC33, y-axis is 1G12, best fit lit is plotted with an  $r^2$  co-efficient of 0.9329.

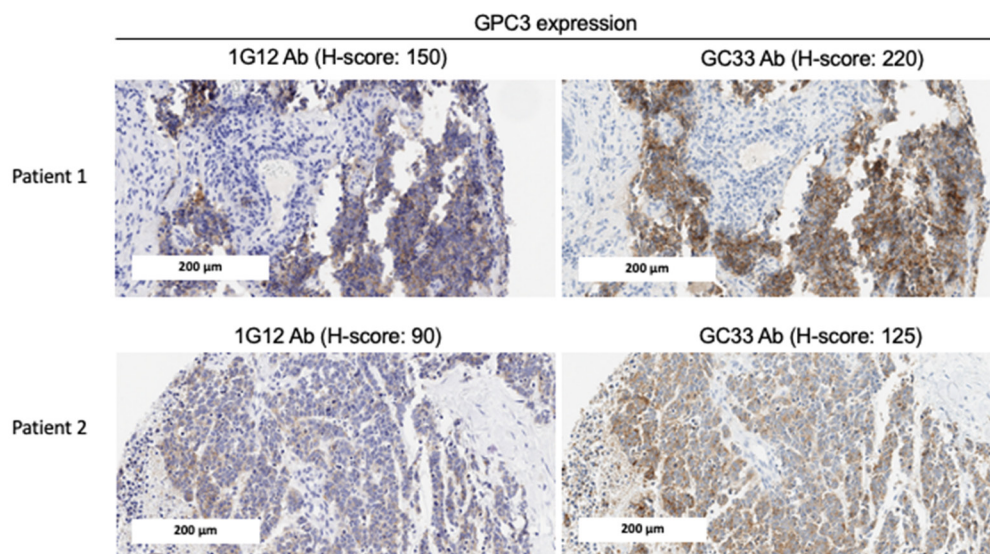

**Supplementary Figure 2: Representative images of 2 IHC assays.** GPC3 IHC scoring of MCC tumor samples from two patients using 1G12 and GC33 antibodies, respectively. The scale bar represents 200  $\mu$ m.

**Supplementary Table 1: Accuracy, sensitivity, specificity and precision of GC33 staining for GPC3 compared to comparator 1G12 staining**

|                                     |                               | <b>GPC3 (1G12) Reference IHC</b> |                               |                |
|-------------------------------------|-------------------------------|----------------------------------|-------------------------------|----------------|
|                                     |                               | <b>Expected GPC3 Positive</b>    | <b>Expected GPC3 Negative</b> | <b>Total</b>   |
| <b>GPC3 (GC33)<br/>IHC Staining</b> | <b>Observed GPC3 Positive</b> | 73 (True Positives)              | 8 (False Positives)           | 48% (81/169)   |
|                                     | <b>Observed GPC3 Negative</b> | 0 (False Negatives)              | 88 (True Negatives)           | 52% (88/169)   |
|                                     | <b>Total</b>                  | 43% (73/169)                     | 57% (96/169)                  | 100% (169/169) |
